# Supplementary material for: Low expression of CCKBR in the acinar cells is associated with insufficient starch hydrolysis in ruminants
Source: PubMed Central journal article supplement — Commun Biol. 2024 Dec 20;7:1686. doi: 10.1038/s42003-024-07406-9 (PMC11662026; doi:10.1038/s42003-024-07406-9), 2024-12-20
Supplement: 42003_2024_7406_MOESM2_ESM.pdf [file 42003_2024_7406_MOESM2_ESM.pdf]

## Supplementary Information

### Low Expression of CCKBR in the Acinar Cells is Associated with Insufficient Starch Hydrolysis in Ruminants

Yan Cheng<sup>1,2</sup>, Tianxi Zhang<sup>1,2</sup>, Chao Yang<sup>1,2</sup>, Kefyalew Gebeyew<sup>1,2</sup>, Chengyu Ye<sup>3</sup>, Xinxin Zhou<sup>4</sup>, Tianqi Zhang<sup>5</sup>, Ganyi Feng<sup>1,2</sup>, Rui Li<sup>1,2</sup>, Zhixiong He<sup>1,2\*</sup>, Oren Parnas<sup>6\*</sup>, Zhiliang Tan<sup>1,2\*</sup>

#### Affiliations

<sup>1</sup>CAS Key Laboratory for Agro-Ecological Processes in Subtropical Region, National Engineering Laboratory for Pollution Control and Waste Utilization in Livestock and Poultry Production, Hunan Provincial Key Laboratory of Animal Nutritional Physiology and Metabolic Process, Institute of Subtropical Agriculture, The Chinese Academy of Sciences, Changsha, Hunan 410125, China

<sup>2</sup>University of Chinese Academy of Sciences, Beijing 100049, China

<sup>3</sup>The Department of Microbiology and Immunology, Emory University, 201 Dowman Dr, Atlanta, GA 30322

<sup>4</sup>LC-Bio Technology (Hangzhou) co.ltd., Hangzhou 310000, China

<sup>5</sup> College of Horticulture, Nanjing Agricultural University, Nanjing, Jiangsu 210095, China

<sup>6</sup> The Lautenberg Center for Immunology and Cancer Research, Faculty of Medicine, The Hebrew University of Jerusalem, Jerusalem, 91120, Israel

\* Corresponding author:

Zhixiong He, Tianqi Zhang, Oren Parnas, Zhiliang Tan,  
Address: Institute of Subtropical Agriculture, the Chinese Academy of Sciences, Changsha, Hunan 410125, P.R. China; College of Horticulture, Nanjing Agricultural University, Nanjing, Jiangsu 210095, China; The Lautenberg Center for Immunology and Cancer Research, Faculty of Medicine, The Hebrew University of Jerusalem, Jerusalem, 91120, Israel.

Email: zxhe@isa.ac.cn; oren.parnas@gmail.com; zltan@isa.ac.cn.

31 **1. Materials and methods**

32 *1.1 Sample preparation for single-cell RNA-seq*

33 One portion of tissue from twin female goats (n=2/group) was minced into 2-3 mm pieces and  
34 then incubated in a 37 °C water bath with multiple enzymes (1.0 mg/mL collagenase IV, 2.0 mg/mL  
35 dispase, and 50 U/mL DNase I) at 100 × rpm for 30 min. We added 10% FBS to stop the digestion  
36 process, followed by a filtration step using 70-µm and 30-µm Smart Strainer (Miltenyi Biotec,  
37 Bergisch Gladbach, Germany). Then the supernatant was discarded, and cells were collected (400  
38 × g for 7 min at 12 °C). To remove red blood cells, dead cells, and cellular debris from the dissociated  
39 cells, we used Red Blood Cell Lysis Buffer and the MACS Dead Cell Removal Kit (Miltenyi Biotec,  
40 Bergisch Gladbach, Germany) as per the manufacturer's direction. After that, the total cell count  
41 and viability were checked using a hemocytometer (Thermo Fisher Scientific) and trypan blue  
42 (Thermo Fisher Scientific, Waltham, MA, USA), respectively. Finally, single-cell suspensions  
43 without cell debris and having greater than 90% viability were passed to the subsequent analysis.  
44 The appropriate volume was calculated for a target capture of 8000 cells, and then the cells were  
45 further diluted to a user guide concentration (700-1200 cells/µL) with 1× PBS with 0.04% BSA for  
46 10x Genomics sequencing.

47 *1.2 Single-cell RNA-seq library construction and sequencing*

48 Briefly, to obtain single-cell gel bead-in-emulsions (GEM), we loaded the cellular suspensions  
49 onto the latest 10x Chromium™ Single Cell 3' Solution system. Then, we used the 10x Genomics  
50 3' Reagent Kits v3 and Agilent Bioanalyzer High Sensitivity chip to construct and check the quality  
51 of the scRNA-seq libraries, respectively. To reduce the batch effects of samples, we constructed the  
52 libraries using the exact versions of kits as per the manufacturer's protocols. The libraries were  
53 sequenced on the same Illumina NovaSeq 6000 sequencing system in a 150-bp paired-ended manner

54 by LC-Bio Technology Co., Ltd. (Hangzhou, China) at a minimum depth of 20,000 reads per cell.

### 55 1.3 *Single-cell RNA-seq data analysis*

56 The Illumina bcl2fastq software (version 5.01) were applied to convert the sequencing results  
57 in to FASTQ files. Raw data were demultiplexed, barcode and mapped to the goat reference genome  
58 ([https://www.ncbi.nlm.nih.gov/assembly/GCF\\_001704415.1/](https://www.ncbi.nlm.nih.gov/assembly/GCF_001704415.1/)) using the Cell Ranger package  
59 (version 3.1.0). Primary alignment to the Cell Ranger showed 95% valid barcodes and 54.30%  
60 sequencing saturation. Feature-barcode raw digital gene expression matrix (UMI counts per gene  
61 per cell) was filtered and normalized by using the R package Seurat [1] (Version 3.1.1). Overall,  
62 genes detected in fewer than one cell were filtered out, and cells were excluded if they expressed  
63 fewer than 500 detected genes, UMI counts less than Inf, and the percent of mitochondrial-DNA  
64 derived gene expression below 25%. The Doublet Finder [2] package (version 2.0.3) was also  
65 employed to filter out doublets. scRNA-seq data that met quality control criteria were used for  
66 transcriptomic analysis.

### 67 1.4 *Uniform manifold approximation and projections (UMAP) analysis of single-cell RNA-seq* 68 *datasets and identification of cell clusters*

69 Following the removal of the low-quality cells and doublets, the “LogNormalize” method in  
70 the Seurat package was used to normalize the expression of the data. Then the principal component  
71 analysis (PCA) was performed using the “RunPCA” function based on the normalized expression  
72 value. Using a Jackstraw substitution test algorithm, we select the top ten principal components (PC)  
73 from the PCA analysis results for subsequent unsupervised clustering and cluster analysis. The  
74 process of clustering cells was performed using the “FindClusters” function with an appropriate  
75 resolution Two-dimensional visualization was obtained with a UMAP[3].

76 Differentially expressed genes (DEGs) or marker genes for each significant cluster were found  
77 using the Wilcoxon rank-sum test (default parameter is “bimod”: likelihood-ratio test) as  
78 implemented in the “FindAllMarkers” function ( $|\log_2 \text{FC}| \geq 1$  and adjusted P value  $\leq 0.01$ ). Only  
79 genes representing or expressing greater than 10% of the cells in a given cluster were considered.  
80 Manual annotation (a combination of marker genes identified from the literature, marker gene list,  
81 and gene ontology for cell types) was applied to assigned cell cluster identity. The Seurat function  
82 of FeaturePlot, VlnPlot, and DotPlot were employed to plot the expression of selected genes. We  
83 used heatmap.2 function from the gplots v3.6.1 R package with the default complete-linkage  
84 clustering algorithm to construct heat maps.

#### 85 *1.5 Inference of differentiation trajectories*

86 Single-cell trajectories were constructed using the R package monocle [4] Version 2.4 with the  
87 default parameter settings and the partition-based graph abstraction (PAGA) [5] with an edge  
88 significance threshold of 0.6.

#### 89 *1.6 Estimation of transcriptional noise*

90 Estimation of transcriptional noise was performed mainly based on previous work [6]. Here,  
91 we presented two measurements of transcriptional noise. Specifically, we first ensure that each cell  
92 cluster has at least 10 cells. In order to avoid the impact brought by different UMI counts, each cell  
93 was down-sampled to 100,000 UMIs so that all cells had an equal number of total UMI counts.  
94 Similarly, to account for differences in cell-type frequency, we subsampled cell numbers to maintain  
95 equal numbers of cells for the two groups. We then divided genes into 10 equally sized bins by mean  
96 expression, with the top and bottom bins excluded. The 10% of genes with the lowest coefficient of  
97 variation (CV) from each bin were kept. These genes were then used to calculate the Euclidean

98 distance between each cell and its corresponding cell type mean. This Euclidean distance was used  
99 as one measure of transcriptional noise for each cell. The ratios of transcriptional noise between  
100 neonatal and adult goats for each cell type were subsequently calculated. We also calculated the  
101 average Euclidean distances for each goat. Alternatively, we used the 1–Spearman correlation  
102 coefficient as the second measure. Spearman's correlation coefficients were calculated using the  
103 subsampled gene expression matrices between each cell type and age group (neonatal and adult  
104 stages). We then used Wilcoxon's rank sum test to statistically evaluate the relationship between  
105 transcriptional noise and age for each cell type. The Bonferroni–Hochberg method was used to  
106 correct the p values.  
107

108 **2. Supplementary Figures**

109 Figure. S1. Transcriptomic characteristics of the goat Pancreas. (A) Split views showed the  
110 biological duplicate effect on NG and AG groups. (B) UAMP clustering of 35,449 cells isolated  
111 from pancreas of neonatal (NG group) and adult goats (AG group). Cells are colored according to  
112 the cluster. Each dot represents a single cell. (C) Expression level of marker of acinar cell in different  
113 subsets. (D) Expression level of marker of ductal cell in different subsets.

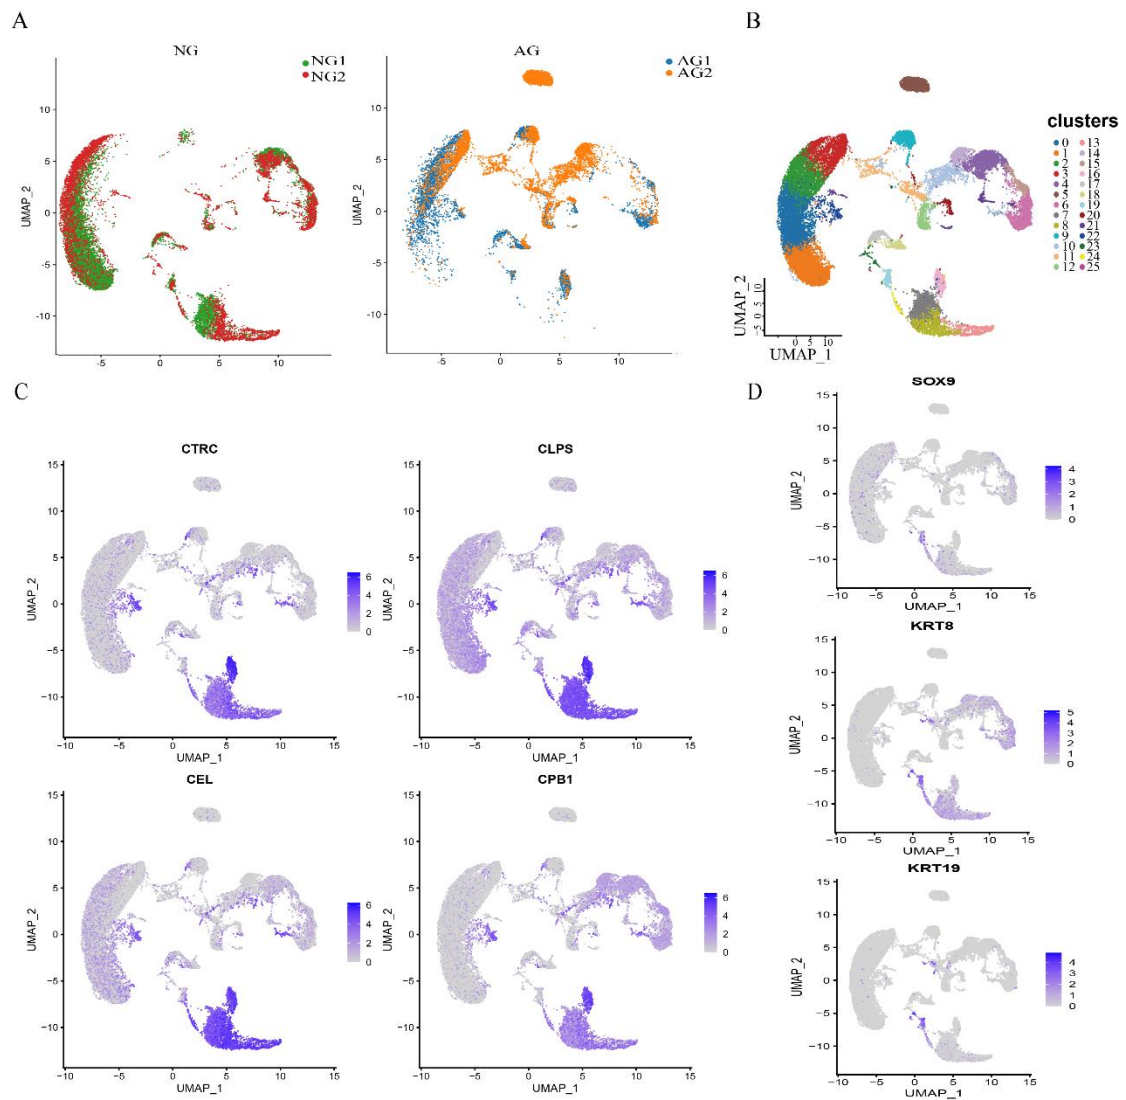

114

115

116

117 Figure. S2. Heterogeneity of AC cells reveal the differential metabolic responses. UAMP clustering  
 118 of 3483 pancreatic AC cells isolated from NG and AG samples. Cells are colored based on the  
 119 clusters (A) and samples (B), respectively. (C) Expression level of markers of acinar cell subtype in  
 120 different subsets. (D) List of the significant GSEA terms. (E) Expression of representative candidate  
 121 genes of acinar cell subtype along pseudotime.

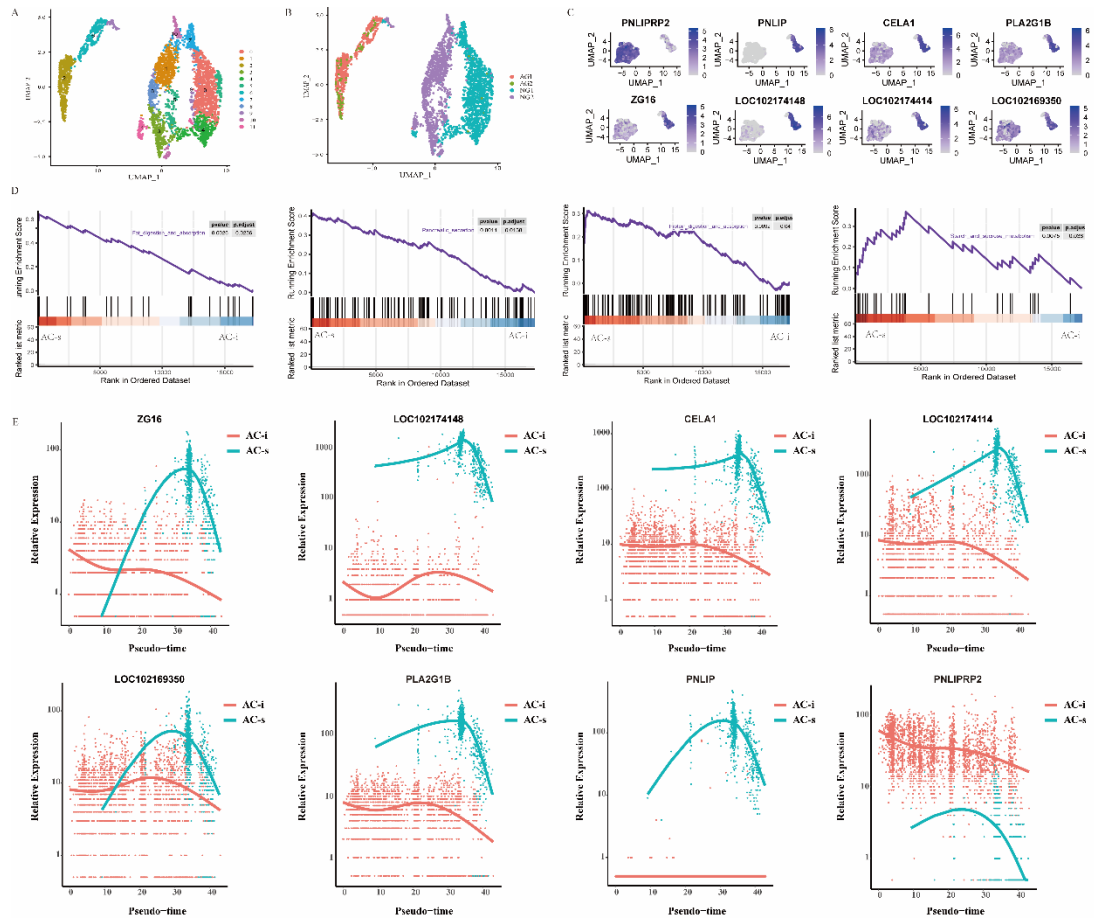

122  
 123

124 Figure. S3. Cell-to-cell signaling networks and gene expression alterations of pancreatic endocrine  
 125 cells of adult goats. Cell-to-cell signaling networks in neonatal goats (A) and adult goats (B).  
 126 Networks depicting cell types as nodes and interactions as edges. Edge thickness is proportional to  
 127 the number of interactions between the connecting types. (B) Heat map depicting the number of all  
 128 possible interactions between the clusters analyzed in neonatal goats (C) and adult goats (D).  
 129 Volcano map showing the number of DE genes between cells from AG and NG samples in  $\beta$  (E)  
 130 and  $\delta$  (F), with red and blue colors corresponding to up-and-downregulated genes in AG samples,  
 131 respectively. Non-differential genes are shown in grey color.

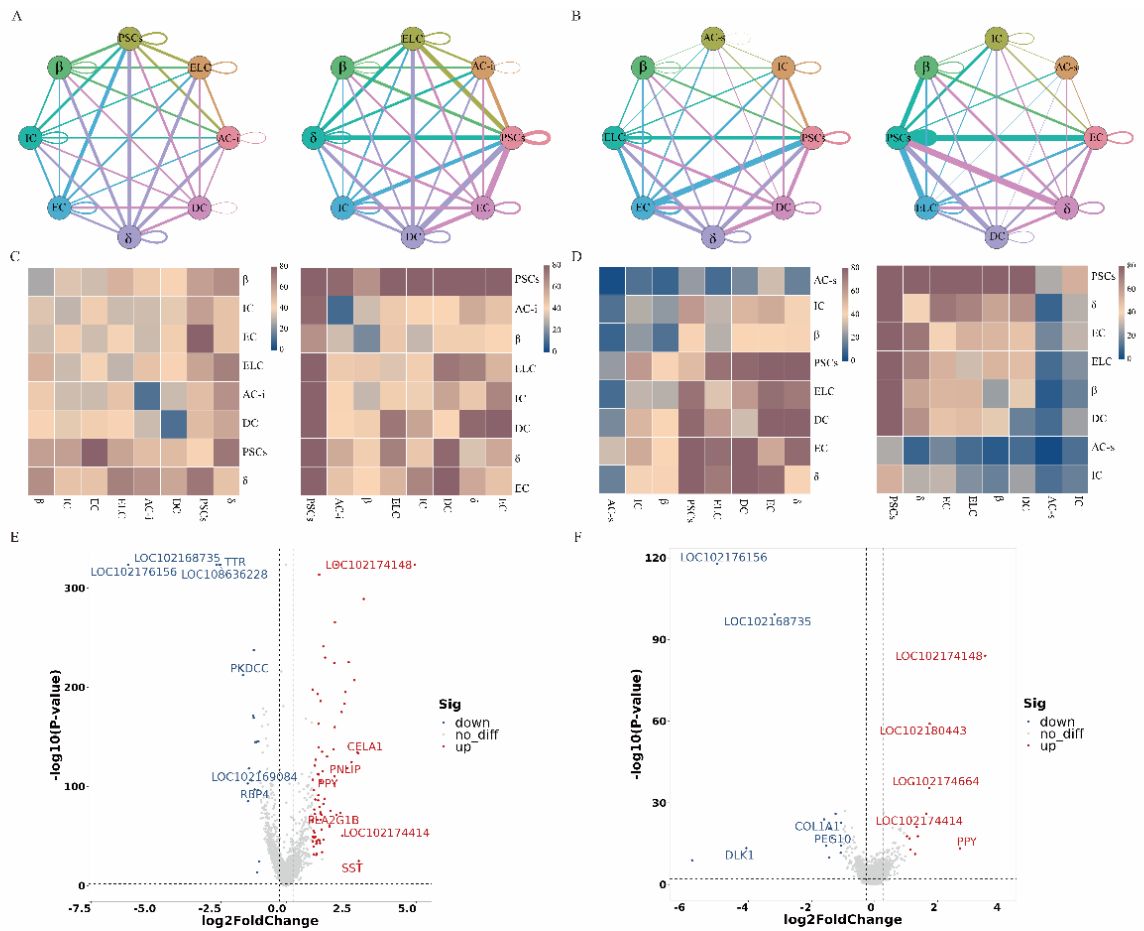

132  
 133



134 Figure. S4. Western blot analysis of PNLIPRP2, CTCR, CPB1, PLA2G1B, Amylase and  $\beta$ -Actin in  
 135 pancreatic tissue. Note: 1) the PVDF membrane was cut according to the size of the target protein.  
 136 Then, the membranes were incubated with primary antibodies in TBST (including 5% BSA). The  
 137 complete picture is provided here without cropping as it is. 2) The protein bands (40~10kDa) did  
 138 not show color, so we labeled the protein size on the PVDF membrane based on the color on the  
 139 membrane.

Amylase (53kDa):

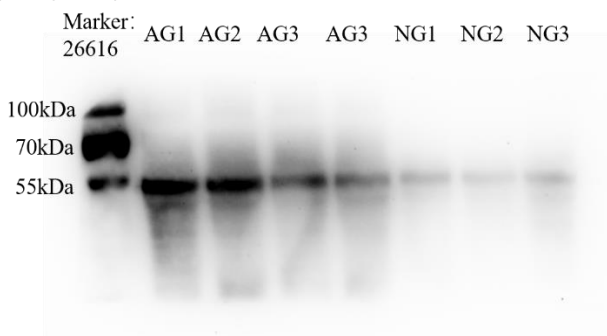

140

CPB1 (47kDa):

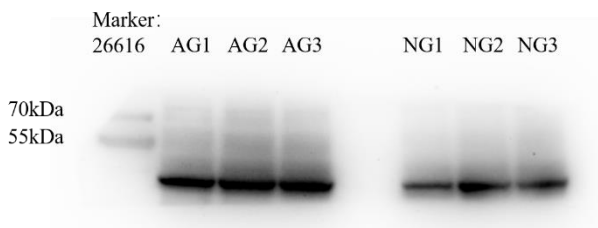

$\beta$ -actin (42kDa):

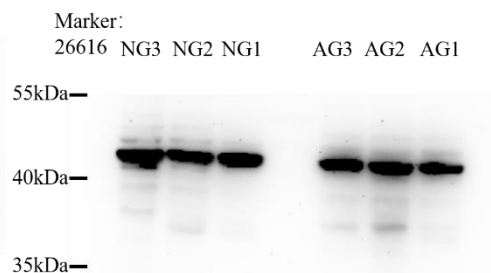

PNLIPRP2 (52kDa):

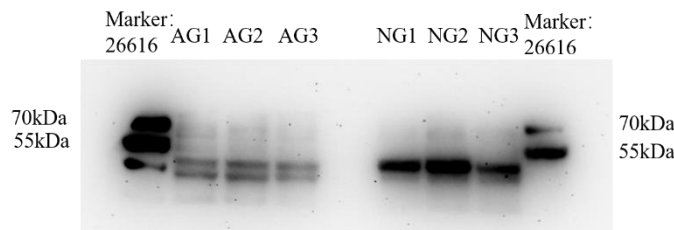

141

CTCR (29kDa):

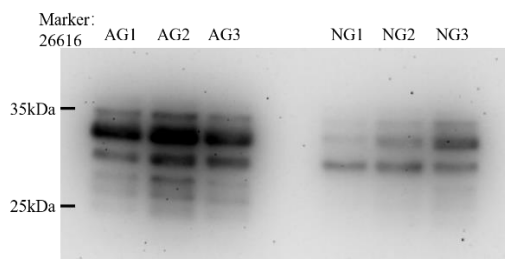

PLA2G1B (13~16kDa):

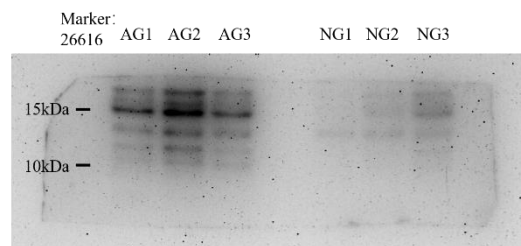

142

143 **3. Supplementary Tables**

144 Table. S1. Overview of key genes from scRNA-seq data, divided by each cell  
 145 compartment, that exhibit relatively high or specific expression in each cell types used  
 146 for characterization annotation, related to Figure 1.

| Compartment                | Cell type         | Key genes                    | Reference                                                                     |
|----------------------------|-------------------|------------------------------|-------------------------------------------------------------------------------|
| Islet endocrine cell types | $\beta$           | <i>INS</i>                   | Lawlor et al., 2017 [7],<br>Li et al., 2016a [8]                              |
|                            | $\delta$          | <i>GCG</i>                   |                                                                               |
|                            | ELC               | <i>SST, PPY</i>              |                                                                               |
| exocrine cell types        | AC                | <i>CTRC, CLPS, CEL, CPB1</i> | Whitcomb & Lowe,<br>2007 [9]                                                  |
|                            | DC                | <i>KRT8, KRT19, SOX9</i>     | Lawlor et al., 2017 [7],<br>Li et al., 2016a [8],<br>Prévot et al., 2012 [10] |
| Nonpancreatic cell types   | EC                | <i>PECAM1, VWF</i>           | Segerstolpe et al., 2016<br>[11]                                              |
|                            | activated<br>PSCs | <i>PDGFRA, COL1A2</i>        | Tang et al., 2022 [12],<br>Baron et al., 2016 [13]                            |
|                            | B                 | <i>MS4A1, CD19, CD79A</i>    | Adams et al., 2009 [14]                                                       |
|                            | T                 | <i>CD3E, CD3D</i>            | Tang et al., 2022 [12],<br>de Saint et al., 2004 [15]                         |
|                            | macrophages       | <i>C1QA, C1QB, C1QC</i>      | Tang et al., 2022 [12],<br>Li et al., 2023[16]                                |
|                            | granulocytes      | <i>S100A9, S100A8</i>        | Scott et al., 2020 [17]                                                       |

147

148

149 **Table. S2.** List of specific and highly expressed pancreatic digestive enzymes-related genes identified in acinar cells of goats.

| Item              | Description                                | Gene transcript | Proportion of AC transcripts |
|-------------------|--------------------------------------------|-----------------|------------------------------|
| Digestive zymogen |                                            |                 |                              |
| LOC102176156      | chymotrypsinogen B                         | 1652            | 2010/10000                   |
| LOC102174148      | chymotrypsinogen A                         | 217             |                              |
| LOC102173875      | chymotrypsinogen B                         | 128             |                              |
| ZG16              | zymogen granule protein 16                 | 10              |                              |
| CYM               | prochymosin                                | 3               |                              |
| Protease          |                                            |                 |                              |
| PRSS2             | protease, serine 2                         | 365             | 957/10000                    |
| LOC1021783207     | carboxypeptidase A1                        | 243             |                              |
| CTRC              | Chymotrypsin C                             | 90              |                              |
| CELA1             | chymotrypsin like elastase family member 1 | 75              |                              |
| CPB1              | carboxypeptidase B1                        | 68              |                              |

|              |                                             |     |           |
|--------------|---------------------------------------------|-----|-----------|
| LOC102179184 | cationic trypsin                            | 55  |           |
| LOC102174414 | chymotrypsin-like elastase family member 2A | 50  |           |
| LOC102178719 | cationic trypsin                            | 8   |           |
| PRSS23       | protease, serine 23                         | 1   |           |
| CPM          | carboxypeptidase M                          | 1   |           |
| <hr/>        |                                             |     |           |
| Lipase       |                                             |     |           |
| CLPS         | colipase                                    | 327 | 526/10000 |
| CEL          | carboxyl ester lipase                       | 114 |           |
| PLA2G1B      | phospholipase A2 group 1B                   | 33  |           |
| PNLIPRP2     | pancreatic lipase related protein 2         | 30  |           |
| PNLIP        | pancreatic lipase                           | 23  |           |
| <hr/>        |                                             |     |           |
| Amylase      |                                             |     |           |
| LOC102169350 | alpha-amylase 2B                            | 15  | 15/10000  |
| <hr/>        |                                             |     |           |

150

151

152 **Table. S3.** Nutrient contents of milk in the NG group.

153

| Milk feed composition, % | Content |
|--------------------------|---------|
| Total Solids             | 23.50   |
| Protein                  | 15.67   |
| Fat                      | 4.15    |
| Lactose                  | 3.48    |
| Urea, mg/dL              | 28.70   |

154

155

156 **Table. S4.** Nutrient contents of solid feed in the AG group.

157

| TMR feed composition, %          | Content |
|----------------------------------|---------|
| Ricestraw                        | 70      |
| Soybeans                         | 15      |
| Corn                             | 8.2     |
| CaCO <sub>3</sub>                | 2.9     |
| CaH <sub>2</sub> PO <sub>4</sub> | 0.1     |
| Fat                              | 0.3     |
| Nacl                             | 1       |
| Premix                           | 0.5     |
| TMR nutritional level            |         |
| DM (%)                           | 96.2    |
| ASH (%)                          | 12.71   |
| CP (%)                           | 10.8    |
| NDF (%)                          | 49.8    |
| ADF (%)                          | 28.4    |
| Starch (%)                       | 11.5    |
| Energy (MJ/Kg)                   | 16.8    |

158 Note: Premix (per kilogram) contains 6.9 g Fe, 4.4 g Cu, 1.1 g Co, 11.2 g I, 11.0 g Mn,  
159 4.6 g Zn, 0.3 g Se, 104.2 g Mg, 10,000,000 IU vitamin A, 16,000,000 IU vitamin D,  
160 12,000 IU vitamin E, 400 g NaHCO<sub>3</sub>, and 400.9 g carrier.

161

162

163

**Table. S5.** Overview of antibody information in this study.

164

| Application | Antibody name      | Company     | Batch      | Dilution |
|-------------|--------------------|-------------|------------|----------|
| IHC         | Amylase            | Santa       | sc-46657   | 1: 1000  |
|             | CPB1               | abcam       | ab153716   | 1: 1000  |
|             | PNLIPRP2           | Proteintech | 26218-1-AP | 1: 400   |
|             | CCKAR              | Proteintech | 16550-1-AP | 1: 200   |
|             | CCKBR              | Proteintech | 16549-1-AP | 1: 50    |
|             | VIPR1              | Proteintech | 14878-1-AP | 1: 200   |
|             | VIPR2              | Bioss       | bs-0197R   | 1: 400   |
|             | SCTR               | Proteintech | 14172-1-AP | 1: 400   |
|             | Secondary antibody | Sparkjade   | EF0002     | 1: 200   |
| WB          | PNLIPRP2           | Proteintech | 26218-1-AP | 1: 1000  |
|             | CTRC               | Bioss       | bs-13948R  | 1: 1000  |
|             | CPB1               | Abcam       | ab153716   | 1: 1000  |
|             | PLA2G1B            | Proteintech | 66397-1-IG | 1: 500   |
|             | Amylase            | Santa       | sc-46657   | 1: 1000  |
|             | $\beta$ -actin     | Bioss       | bs-0061R   | 1: 1000  |
| IF          | CPA1               | Proteintech | 15836-1-AP | 1: 100   |
|             | CCKBR              | Proteintech | 16549-1-AP | 1: 100   |
|             | CCK                | Proteintech | 13074-2-AP | 1: 400   |
|             | Secondary antibody | YEASEN      | 33107ES60  | 1: 200   |

165

166

167

- 169 [1] Y.H. Hao, S. Hao, E. Andersen-Nissen, W.M. Mauck, S.W. Zheng, A. Butler, M.J. Lee, A.J. Wilk, C.  
170 Darby, M. Zager, P. Hoffman, M. Stoeckius, E. Papalexi, E.P. Mimitou, J. Jain, A. Srivastava, T. Stuart,  
171 L.M. Fleming, B. Yeung, A.J. Rogers, J.M. McElrath, C.A. Blish, R. Gottardo, P. Smibert, R. Satija,  
172 Integrated analysis of multimodal single-cell data, *Cell* 184(13) (2021) 3573-+.
- 173 [2] C.S. McGinnis, L.M. Murrow, Z.J. Gartner, DoubletFinder: Doublet Detection in Single-Cell RNA  
174 Sequencing Data Using Artificial Nearest Neighbors, *Cell Systems* 8(4) (2019) 329-+.
- 175 [3] E. Becht, L. McInnes, J. Healy, C.A. Dutertre, I.W.H. Kwok, L.G. Ng, F. Ginhoux, E.W. Newell,  
176 Dimensionality reduction for visualizing single-cell data using UMAP, *Nature Biotechnology* 37(1)  
177 (2019) 38-+.
- 178 [4] J.Y. Cao, M. Spielmann, X.J. Qiu, X.F. Huang, D.M. Ibrahim, A.J. Hill, F. Zhang, S. Mundlos, L.  
179 Christiansen, F.J. Steemers, C. Trapnell, J. Shendure, The single-cell transcriptional landscape of  
180 mammalian organogenesis, *Nature* 566(7745) (2019) 496-+.
- 181 [5] F.A. Wolf, F.K. Hamey, M. Plass, J. Solana, J.S. Dahlin, B. Göttgens, N. Rajewsky, L. Simon, F.J.  
182 Theis, PAGA: graph abstraction reconciles clustering with trajectory inference through a topology  
183 preserving map of single cells, *Genome Biology* 20 (2019).
- 184 [6] M. Enge, E. Arda, M. Mignardi, J. Beausang, R. Bottino, S.K. Kim, S.R. Quake, Single-Cell Analysis  
185 of Human Pancreas Reveals Transcriptional Signatures of Aging and Somatic Mutation Patterns,  
186 *Cell* 171(2) (2017) 321-+.
- 187 [7] N. Lawlor, J. George, M. Bolisetty, R. Kursawe, L.L. Sun, V. Sivakamasundari, I. Kycia, P. Robson,  
188 M.L. Stitzel, Single-cell transcriptomes identify human islet cell signatures and reveal cell-type  
189 specific expression changes in type 2 diabetes, *Genome Research* 27(2) (2017) 208-222.
- 190 [8] J. Li, J. Klughammer, M. Farlik, T. Penz, A. Spittler, C. Barbieux, E. Berishvili, C. Bock, S. Kubicek,  
191 Single-cell transcriptomes reveal characteristic features of human pancreatic islet cell types, *Embo*  
192 *Reports* 17(2) (2016) 178-187.
- 193 [9] D.C. Whitcomb, M.E. Lowe, Human pancreatic digestive enzymes, *Digestive Diseases and*  
194 *Sciences* 52(1) (2007) 1-17.
- 195 [10] P.P. Prévot, A. Simion, A. Grimont, M. Colletti, A. Khalaileh, G. Van den Steen, C. Sempoux, X.B.  
196 Xu, V. Roelants, J. Hald, L. Bertrand, H. Heimberg, S.F. Konieczny, Y. Dor, F.P. Lemaigre, P.  
197 Jacquemin, Role of the ductal transcription factors HNF6 and Sox9 in pancreatic acinar-to-ductal  
198 metaplasia, *Gut* 61(12) (2012) 1723-1732.
- 199 [11] Å. Segerstolpe, A. Palasantza, P. Eliasson, E.M. Andersson, A.C. Andréasson, X.Y. Sun, S. Picelli,  
200 A. Sabirsh, M. Clausen, M.K. Bjursell, D.M. Smith, M. Kasper, C. Ämmälä, R. Sandberg, Single-Cell  
201 Transcriptome Profiling of Human Pancreatic Islets in Health and Type 2 Diabetes, *Cell Metabolism*  
202 24(4) (2016) 593-607.
- 203 [12] W.J. Tang, Y.F. Zhong, Y.S. Wei, Z.X. Deng, J.D. Mao, J.L. Liu, T.G. Valencak, J.X. Liu, H.P. Xu,  
204 H.F. Wang, Ileum tissue single-cell mRNA sequencing elucidates the cellular architecture of  
205 pathophysiological changes associated with weaning in piglets, *Bmc Biology* 20(1) (2022).
- 206 [13] M. Baron, A. Veres, S.L. Wolock, A.L. Faust, R. Gaujoux, A. Vetere, J.H. Ryu, B.K. Wagner, S.S.  
207 Shen-Orr, A.M. Klein, D.A. Melton, I. Yanai, A Single-Cell Transcriptomic Map of the Human and  
208 Mouse Pancreas Reveals Inter- and Intra-cell Population Structure, *Cell Systems* 3(4) (2016) 346-  
209 +.
- 210 [14] H. Adams, P. Liebisch, P. Schmid, S. Dirnhofer, A. Tzankov, Diagnostic Utility of the B-cell



211 Lineage Markers CD20, CD79a, PAX5. and CD19 in Paraffin-embedded Tissues From Lymphoid  
212 Neoplasms, *Applied Immunohistochemistry & Molecular Morphology* 17(2) (2009) 96-101.  
213 [15] G. de Saint Basile, F. Geissmann, E. Flori, B. Uring-Lambert, C. Soudais, M. Cavazzana-Calvo,  
214 A. Durandy, N. Jabado, A. Fischer, F. Le Deist, Severe combined immunodeficiency caused by  
215 deficiency in either the  $\delta$  or the  $\epsilon$  subunit of CD3, *Journal of Clinical Investigation* 114(10) (2004)  
216 1512-1517.  
217 [16] H.M. Li, Y. Miao, L.Q. Zhong, S.J. Feng, Y. Xu, L. Tang, C. Wu, X.Z. Zhang, L. Gu, H.Y. Diao, H.Y.  
218 Wang, Z.S. Wen, M.L. Yang, Identification of TREM2-positive tumor-associated macrophages in  
219 esophageal squamous cell carcinoma: implication for poor prognosis and immunotherapy  
220 modulation, *Frontiers in Immunology* 14 (2023).  
221 [17] N.R. Scott, R.V. Swanson, N. Al-Hammadi, R. Domingo-Gonzalez, J. Rangel-Moreno, B.A. Kriel,  
222 A.N. Bucsan, S. Das, M. Ahmed, S. Mehra, P. Treerat, A. Cruz-Lagunas, L. Jimenez-Alvarez, M.  
223 Muñoz-Torrico, K. Bobadilla-Lozoya, T. Vogl, G. Walzl, N. du Plessis, D. Kaushal, T.J. Scriba, J. Zú  
224 ñiga, S.A. Khader, S100A8/A9 regulates CD11b expression and neutrophil recruitment during  
225 chronic tuberculosis, *Journal of Clinical Investigation* 130(6) (2020) 3098-3112.  
226
