# Supplementary material for: Low expression of CCKBR in the acinar cells is associated with insufficient starch hydrolysis in ruminants
Source: PubMed Central journal article supplement — Commun Biol. 2024 Dec 20;7:1686. doi: 10.1038/s42003-024-07406-9 (PMC11662026; doi:10.1038/s42003-024-07406-9), 2024-12-20
Supplement: 42003_2024_7406_MOESM3_ESM.pdf [file 42003_2024_7406_MOESM3_ESM.pdf]

## Description of Additional Supplementary Files

**File name:** Supplementary Data 1

Description: The source data of Figure 1.

**File name:** Supplementary Data 2

Description: The source data of Figure 2.

**File name:** Supplementary Data 3

Description: The source data of Figure 3.

**File name:** Supplementary Data 4

Description: The source data of Figure 4.

**File name:** Supplementary Data 5

Description: The source data of Figure 5.

**File name:** Supplementary Data 6

Description: The source data of Figure 6.

**File name:** Supplementary Data 7

Description: The source data of Figure 7.

**File Name:** Supplementary Movie 1

Description: Representative responses of Ca<sup>2+</sup> in goat pancreatic acinar cells isolated from neonatal goats.

**File Name:** Supplementary Movie 2

Description: Representative responses of Ca<sup>2+</sup> in goat pancreatic acinar cells isolated from adult goats.

**File Name:** Supplementary Movie 3

Description: Representative responses of exocytosis in goat pancreatic acinar cells isolated from neonatal goats.

**File Name:** Supplementary Movie 4

Description: Representative responses of exocytosis in goat pancreatic acinar cells isolated from adult goats.
